# Supplementary material for: Type of Vegetarian Diet, Body Weight, and Prevalence of Type 2 Diabetes
Source: Oxford University Press journal article supplement (doi:10.2337/dc08-1886), 2009-04-08
Supplement: dc081886-sup-appendix.doc [file dc081886-sup-appendix.doc]

APPENDIX

Modweek, vigweek and extrweek are the average times spent on moderate, vigorous or extremely vigorous activity on weekdays; modSat, vigSat and extrSat are the corresponding times on Saturday and modSun, vigSun and extrSun are the corresponding times on Sunday. Daily physical activity in metabolic equivalents was then calculated as the sum of these activities.

<mc>Mod = (modweek * **5** + modSat + modSun)/*7;*

<mc>Vig = (vigweek * **5** + vigSat + vigSun)/*7;*

<mc>Extr = (extrweek * **5** + extrSat + extrSun)/*7;*

<mc>Daily physical activity in metabolic equivalents = **4** * Mod + *8 * Vig +* ***10* * Ext**
